# Supplementary material for: Observational benchmarks inform representation of soil organic carbon dynamics in land surface models
Source: Copernicus journal article supplement (doi:10.5194/bg-2023-50), 2023-03-21
Supplement: Supplementary file 1 [file bg-2023-50-supplement.pdf]

## **Supporting Information**

### **Observational benchmarks inform representation of soil organic carbon dynamics in land surface models**

Kamal Nyaupane<sup>1</sup>, Umakant Mishra<sup>2\*</sup>, Feng Tao<sup>3</sup>, Kyongmin Yeo<sup>4</sup>, William J. Riley<sup>5</sup>, Forrest M. Hoffman<sup>6</sup> and Sagar Gautam<sup>2</sup>

\*Corresponding author, email: [umishra@sandia.gov](mailto:umishra@sandia.gov)

Table S1: Environmental variables used as predictors of global soil organic carbon stocks

|    | <b>Variable</b>                     | <b>Resolution</b>                      | <b>Sources</b>                                                                                                        |
|----|-------------------------------------|----------------------------------------|-----------------------------------------------------------------------------------------------------------------------|
| 1  | Longitude                           |                                        | WoSIS                                                                                                                 |
| 2  | Latitude                            |                                        | WoSIS                                                                                                                 |
| 3  | Rmean (Soil Respiration)            | Originally 0.5 deg, resampled to 1km   | <a href="http://cse.ffpri.affrc.go.jp/shojih/data/index.html">http://cse.ffpri.affrc.go.jp/shojih/data/index.html</a> |
| 4  | ESA land cover                      | 1 km                                   | <a href="https://www.esa-landcover-cci.org">https://www.esa-landcover-cci.org</a>                                     |
| 5  | Evapotranspiration                  | Originally 1 deg, resampled to 1km     | <a href="https://www.ntsug.umt.edu/project/global-et.php">https://www.ntsug.umt.edu/project/global-et.php</a>         |
| 6  | IGBP types                          | Originally 0.5 deg, resampled to 1km   | IGBP website                                                                                                          |
| 7  | Soil types                          | Originally 0.083 deg, resampled to 1km | FAO-UNESCO                                                                                                            |
| 8  | NPP mean                            | 1km                                    | (Zhao et al. 2005)                                                                                                    |
| 9  | NPP max                             | 1km                                    | (Zhao et al. 2005)                                                                                                    |
| 10 | NPP min                             | 1km                                    | (Zhao et al. 2005)                                                                                                    |
| 11 | Vegetation cover types              | Originally 0.5 deg, resampled to 1km   | (Channan et al. 2014)                                                                                                 |
| 12 | Annual Mean Temperature             | 1km                                    | (Fick and Hijmans 2017)                                                                                               |
| 13 | Mean Diurnal Range Temperature      | 1km                                    | (Fick and Hijmans 2017)                                                                                               |
| 14 | Isothermality                       | 1km                                    | (Fick and Hijmans 2017)                                                                                               |
| 15 | Temperature Seasonality             | 1km                                    | (Fick and Hijmans 2017)                                                                                               |
| 16 | Max Temperature of Warmest Month    | 1km                                    | (Fick and Hijmans 2017)                                                                                               |
| 17 | Min Temperature of Coldest Month    | 1km                                    | (Fick and Hijmans 2017)                                                                                               |
| 18 | Temperature Annual Range            | 1km                                    | (Fick and Hijmans 2017)                                                                                               |
| 19 | Mean Temperature of Wettest Quarter | 1km                                    | (Fick and Hijmans 2017)                                                                                               |
| 20 | Mean Temperature of Driest Quarter  | 1km                                    | (Fick and Hijmans 2017)                                                                                               |
| 21 | Mean Temperature of Warmest Quarter | 1km                                    | (Fick and Hijmans 2017)                                                                                               |
| 22 | Mean Temperature of Coldest Quarter | 1km                                    | (Fick and Hijmans 2017)                                                                                               |
| 23 | Annual Precipitation                | 1km                                    | (Fick and Hijmans 2017)                                                                                               |
| 24 | Precipitation of Wettest Month      | 1km                                    | (Fick and Hijmans 2017)                                                                                               |
| 25 | Precipitation of Driest Month       | 1km                                    | (Fick and Hijmans 2017)                                                                                               |
| 26 | Precipitation Seasonality           | 1km                                    | (Fick and Hijmans 2017)                                                                                               |
| 27 | Precipitation of Wettest Quarter    | 1km                                    | (Fick and Hijmans 2017)                                                                                               |
| 28 | Precipitation of Driest Quarter     | 1km                                    | (Fick and Hijmans 2017)                                                                                               |
| 29 | Precipitation of Warmest Quarter    | 1km                                    | (Fick and Hijmans 2017)                                                                                               |

|    |                                  |                                       |                                                                                                    |
|----|----------------------------------|---------------------------------------|----------------------------------------------------------------------------------------------------|
| 30 | Precipitation of Coldest Quarter | 1km                                   | (Fick and Hijmans 2017)                                                                            |
| 31 | Absolute Depth to Bedrock        | Originally 250m, resampled to 1km     | (Hengl et al. 2017)                                                                                |
| 32 | Cation exchange capacity         | Originally 250m, resampled to 1km     | (Hengl et al. 2017)                                                                                |
| 33 | Clay content                     | Originally 250m, resampled to 1km     | (Hengl et al. 2017)                                                                                |
| 34 | Coarse fragment fraction         | Originally 250m, resampled to 1km     | (Hengl et al. 2017)                                                                                |
| 35 | Bedrock depth                    | Originally 250m, resampled to 1km     | (Hengl et al. 2017)                                                                                |
| 36 | Grade acid                       | Originally 250m, resampled to 1km     | (Hengl et al. 2017)                                                                                |
| 37 | Occurrence R horizon             | Originally 250m, resampled to 1km     | (Hengl et al. 2017)                                                                                |
| 38 | pH water                         | Originally 250m, resampled to 1km     | (Hengl et al. 2017)                                                                                |
| 39 | Sand content                     | Originally 250m, resampled to 1km     | (Hengl et al. 2017)                                                                                |
| 40 | Silt content                     | Originally 250m, resampled to 1km     | (Hengl et al. 2017)                                                                                |
| 41 | SWC v wilting point              | Originally 250m, resampled to 1km     | (Hengl et al. 2017)                                                                                |
| 42 | Texture                          | Originally 250m, resampled to 1km     | (Hengl et al. 2017)                                                                                |
| 43 | USDA suborder                    | Originally 250m, resampled to 1km     | (Hengl et al. 2017)                                                                                |
| 44 | WRB subgroup                     | Originally 250m, resampled to 1km     | (Hengl et al. 2017)                                                                                |
| 45 | Drought                          | Originally 2.50 deg, resampled to 1km | (Dai et al. 2004)                                                                                  |
| 46 | Elevation                        | Originally 1arc min, resampled to 1km | NOAA,<br><a href="https://www.ngdc.noaa.gov/mgg/global/">https://www.ngdc.noaa.gov/mgg/global/</a> |

## References

- Channan, S., Collins, K., and Emanuel W.: Global mosaics of the standard MODIS land cover type data. University of Maryland and the Pacific Northwest National Laboratory, College Park, Maryland, USA, 30, 2014..
- Dai, A., K. Trenberth, E., and Qian, T.: A global dataset of Palmer Drought Severity Index for 1870–2002: Relationship with soil moisture and effects of surface warming. *J. Hydrometeorol.*, 5, 1117–1130, 2004.
- Fick, S. E., and Hijmans, R. J.: WorldClim 2: new 1-km spatial resolution climate surfaces for global land areas. *Int. J. Climatol.*, 37, 4302–4315, 2017.
- Hengl, T., de Jesus, J. M., Heuvelink, G. B., Gonzalez, M. R., Kilibarda, M., Blagotić, A., Shangguan, W., Wright, M. N., Geng, X. and Bauer-Marschallinger, B.: SoilGrids250m: Global gridded soil information based on machine learning. *PLoS One* 12, e0169748, 2017.

Zhao, M., Heinsch, F. A., Nemani, R. R., and Running S. W.: Improvements of the MODIS terrestrial gross and net primary production global data set. *Remote Sens. Environ.* 95, 164-176, 2005.
